# Supplementary material for: The role of attention bias malleability in experiencing pain and associated disability
Source: PeerJ journal article supplement (doi:10.7717/peerj.17430), 2024-06-03
Supplement: Supplementary_file_1_1.pdf [file Supplementary_file_1_1.pdf]

**Supplementary File 1**

**Word lists**

| <b>List 1</b> |                |
|---------------|----------------|
| <b>Pain</b>   | <b>Neutral</b> |
| FLICKERING    | WATERFALLS     |
| THROBBING     | WALLPAPER      |
| SHOOTING      | POLISHED       |
| BORING        | SWIVEL         |
| DRILLING      | WHIRLING       |
| SHARP         | PLATE          |
| BURNING       | PAINTED        |
| STIFF         | SKIRT          |
| TUGGING       | REFRESH        |
| PINCHING      | POSTMARK       |
| PAIN          | ROOM           |
| STABBING      | BANISTER       |
| TIRING        | PURPLE         |
| EXHAUSTING    | VOLLEYBALL     |
| VICIOUS       | MORNING        |
| ANNOYING      | TOMORROW       |
| MISERABLE     | AUTOMATIC      |
| TROUBLESOME   | APPRECIATED    |
| UNBEARABLE    | RELAXATION     |
| CRUEL         | AGAIN          |
| PUNISHING     | CHARACTER      |
| DISCOURAGING  | OVERSTEPPING   |
| EXCRUCIATING  | SIMULTANEITY   |
| SICKENING     | MAGAZINES      |

| <b>List 2</b> |                |
|---------------|----------------|
| <b>Pain</b>   | <b>Neutral</b> |
| TENSION       | POPCORN        |
| ACHE          | SPUN           |
| SPLITTING     | CORKSCREW      |
| GNAWING       | DAWNING        |
| HURTING       | SPEAKER        |
| POUNDING      | CUPBOARD       |
| STING         | WHISK          |
| SPASM         | PIPER          |
| CRAMPING      | CRAMMING       |
| SORE          | PEGS           |
| SCALDING      | WARDROBE       |
| TWITCHING     | LIGHTBULB      |
| WRETCHED      | FLAWLESS       |
| GRUELLING     | PINEAPPLE      |
| SUFFOCATING   | UNDEMANDING    |
| BLINDING      | KINDLING       |
| INTENSE       | NOTHING        |
| DREADFUL      | MATTRESS       |
| AGONIZING     | ELABORATE      |
| TORTURING     | RECYCLING      |
| HORRIBLE      | OPPOSITE       |
| KILLING       | FASHION        |
| DEBILITATING  | BICENTENNIAL   |
| DEVASTATING   | ARRANGEMENT    |

| <b>List 3</b>  |                |
|----------------|----------------|
| <b>Pain</b>    | <b>Neutral</b> |
| SEARING        | LOANING        |
| CLAWING        | DRESSER        |
| PULSATING      | SIDEBOARD      |
| PENETRATING    | PREDICTABLE    |
| PIERCING       | BOOKCASE       |
| PRESSING       | SWIMMING       |
| BEATING        | ADDRESS        |
| CRUSHING       | BASEMENT       |
| INFLAMED       | ORNAMENT       |
| SQUEEZING      | NEIGHBOUR      |
| TEARING        | PICTURE        |
| TENDER         | DINING         |
| NAGGING        | SILENCE        |
| DISTRESSING    | FACILITATOR    |
| UNCONTROLLABLE | HYPOTHETICALLY |
| TERRIBLE       | EXCHANGE       |
| DIFFICULT      | AMENDMENT      |
| DEPRESSING     | FRIENDSHIP     |
| FEARFUL        | MESSAGE        |
| SUFFERING      | NUTRITION      |
| AGGRAVATING    | CONVERTIBLE    |
| UNPLEASANT     | FORGETTING     |
| UNCOMFORTABLE  | SOPHISTICATED  |
| FRIGHTFUL      | HATCHLING      |
